# Supplementary material for: Impact of a new emission inventory on CAM5 simulations of aerosolsand aerosol radiative effects in eastern China
Source: Copernicus journal article supplement (doi:10.5194/acp-2016-802), 2016-09-28
Supplement: Supplementary file 1 [file acp-2016-802-supplement.pdf]

## Supplement of

# Impact of a new emission inventory on CAM5 simulations of aerosols and aerosol radiative effects in eastern China

T. Fan et al.

5 Correspondence to: T. Fan (fantianyi@bnu.edu.cn)

## 1. Emission

**Table S1. Mapping the MEIC emission to CAM5-MAM3 emission input data in China.**

| Species                  | Elevation | Sectors in CAM5 <sup>a</sup> | AR5 emission rates <sup>c</sup><br>(Gg/year) | Sectors in MEIC and mapping treatment <sup>b</sup> | MEIC emission rates <sup>f</sup><br>(Gg/year) |
|--------------------------|-----------|------------------------------|----------------------------------------------|----------------------------------------------------|-----------------------------------------------|
| <b>SO<sub>2</sub></b>    | Surface   | dom                          | 1692.2                                       | res SO <sub>2</sub> x 97.5%                        | 1593.3                                        |
|                          |           | tra                          | 289.0                                        | tra SO <sub>2</sub> x 97.5%                        | 101.1                                         |
|                          |           | awb                          | 29.9                                         | - <sup>c</sup>                                     | 29.9                                          |
|                          |           | wst                          | 0.0                                          | -                                                  | 0.0                                           |
|                          |           | shp                          | 11.2                                         | -                                                  | 11.2                                          |
|                          | Elevated  | ene                          | 7946.7                                       | pow SO <sub>2</sub> x 97.5% <sup>d</sup>           | 4650.3                                        |
|                          |           | ind                          | 2937.5                                       | Ind SO <sub>2</sub> x 97.5%                        | 7826.3                                        |
|                          |           | forest fire                  | 7.0                                          | -                                                  | 7.0                                           |
|                          |           | grass fire                   | 1.4                                          | -                                                  | 1.4                                           |
|                          |           | contvolc                     | 0.0                                          | -                                                  | 0.0                                           |
| <b>Acc. mode sulfate</b> | Surface   | awb                          | 0.8                                          | -                                                  | 0.8                                           |
|                          |           | wst                          | 0.0                                          | -                                                  | 0.0                                           |
|                          |           | shp                          | 0.3                                          | -                                                  | 0.3                                           |
|                          | Elevated  | ene                          | 203.3                                        | pow SO <sub>2</sub> x 2.5%                         | 119.2                                         |
|                          |           | ind                          | 75.3                                         | ind SO <sub>2</sub> x 2.5%                         | 200.7                                         |
|                          |           | forest fire                  | 0.2                                          | -                                                  | 0.2                                           |
|                          |           | grass fire                   | 0.0                                          | -                                                  | 0.0                                           |
|                          |           | contvolc                     | 0.0                                          | -                                                  | 0.0                                           |
| <b>Ait. mode</b>         | Surface   | dom                          | 43.4                                         | res SO <sub>2</sub> x 2.5%                         | 40.9                                          |

|                     |          |          |                |                                                                                                    |                |
|---------------------|----------|----------|----------------|----------------------------------------------------------------------------------------------------|----------------|
| <b>sulfate</b>      |          | tra      | 7.4            | tra SO <sub>2</sub> x 2.5%                                                                         | 2.6            |
|                     | Elevated | contvolc | 0.0            | -                                                                                                  | 0.0            |
| <b>Total sulfur</b> |          |          | <b>13246.0</b> |                                                                                                    | <b>14585.2</b> |
| <b>BC</b>           | Surface  | ene      | 20.5           | pow BC                                                                                             | 1.9            |
|                     |          | ind      | 853.8          | Ind BC                                                                                             | 546.4          |
|                     |          | dom      | 581.9          | res BC                                                                                             | 881.3          |
|                     |          | tra      | 74.7           | tra BC                                                                                             | 286.1          |
|                     |          | awb      | 43.9           | -                                                                                                  | 43.9           |
|                     |          | wst      | 6.4            | -                                                                                                  | 6.4            |
|                     |          | shp      | 0.3            | -                                                                                                  | 0.3            |
|                     | Elevated | fst      | 9.8            | -                                                                                                  | 9.8            |
|                     |          | grs      | 3.6            | -                                                                                                  | 3.6            |
| <b>Total BC</b>     |          |          | <b>1595.0</b>  |                                                                                                    | <b>1779.8</b>  |
| <b>POM</b>          | Surface  | ene      | 93.6           | pow OC x 1.4                                                                                       | 0.0            |
|                     |          | ind      | 1567.8         | ind OC x 1.4                                                                                       | 707.5          |
|                     |          | dom      | 2314.5         | res OC x 1.4                                                                                       | 3778.8         |
|                     |          | tra      | 129.5          | tra OC x 1.4                                                                                       | 148.3          |
|                     |          | awb      | 292.8          | -                                                                                                  | 292.8          |
|                     |          | wst      | 9.0            | -                                                                                                  | 9.0            |
|                     |          | shp      | 0.5            | -                                                                                                  | 0.5            |
|                     | Elevated | fst      | 185.3          | -                                                                                                  | 185.3          |
|                     |          | grs      | 36.2           | -                                                                                                  | 36.2           |
| <b>Total POM</b>    |          |          | <b>4629.0</b>  |                                                                                                    | <b>5158.4</b>  |
| <b>SOAG</b>         | Surface  | BIGALK   | 179.8          | (pow + ind + tra + res<br>ALK3, ALK4,<br>ALK5)*molecular<br>weight *mass<br>yield*1.5 <sup>g</sup> | 376.2          |
|                     |          | BIGENE   | 33.6           | (pow + ind + tran + res<br>OLE2) *molecular                                                        | 91.4           |

|            |                   | weight *mass<br>yield*1.5 |                                       |               |
|------------|-------------------|---------------------------|---------------------------------------|---------------|
|            | TOLUENE           | 352.8                     | (pow + ind + tra + res<br>ARO1, ARO2) | 1031.9        |
|            |                   |                           | *molecular weight<br>*mass yield*1.5  |               |
|            | ISOPRENE          | 712.6                     | -                                     | 712.6         |
|            | TERPENE           | 1289.6                    | -                                     | 1289.6        |
|            | <b>Total SOAG</b> | <b>2568.3</b>             |                                       | <b>3501.6</b> |
| <b>DMS</b> | Surface           | 8.2                       | -                                     | 8.2           |

<sup>a</sup> The AR5 sector abbreviations are dom (domestic), tra (transportation), ind (industry), ene (energy), wst (waste treatment), awb (agricultural waste burning), shp (shipping), fst (forestfire), grs (grass fire) and contvolc (continuous volcano).

10 <sup>b</sup> The MEIC sector abbreviations are res (residential), tra (transportation), ind (industry), and pow(power).

<sup>c</sup> “-” means that the species in the sector is the same as AR5 emission.

<sup>d</sup> The elevated energy and industry emissions are emitted in mass fraction of 15.5% , 75.1%, and 9.4% at approximately 30, 130, and 280 meters.

15 <sup>e</sup> The masses of SO<sub>2</sub>, sulfate and DMS are in unit of Gg of Sulfur per year in China. The unit of BC mass is Gg of Carbon per year and the units of POM and SOAG mass are Gg of POM per year, which is assumed to be 1.4 times OC (or Carbon) mass.

<sup>f</sup> The units are the same as in the column of AR5 emission rates.

<sup>g</sup> Atomic compositions for BIGALK, BIGENE, TOLUENE are C<sub>5</sub>H<sub>12</sub>, C<sub>4</sub>H<sub>8</sub>, and C<sub>6</sub>H<sub>5</sub>(CH<sub>3</sub>), respectively. Mass yields of BIGALK, BIGENE, and TOLUENE are 5%, 5%, 15%, respectively.

20

## 2. Observed surface concentration of aerosol in China

**Table S2. The observations of surface concentrations of chemical species in PM<sub>2.5</sub> over eastern China in 2009 and 2010.**

| Locations    | Coordinates           | Time                              | Chemical species       | References          | Location type      |
|--------------|-----------------------|-----------------------------------|------------------------|---------------------|--------------------|
| Harbin       | 45.82°N,<br>126.56°E  | Aug-Dec, 2010                     | SO <sub>4</sub> ,BC,OC | Huang et al.[2014]  | urban              |
| Chengde      | 40.95°N,<br>117.96°E  | April/July/Oct,<br>2009;Jan, 2010 | SO <sub>4</sub> ,BC,OC | Zhao et al. [2013]  | urban              |
| Shangdianzi  | 38.04°N,<br>114.51°E  | April/July/Oct,<br>2009;Jan, 2010 | SO <sub>4</sub> ,BC,OC | Zhao et al. [2013]  | rurual             |
| Beijing1     | 39.93°N,<br>116.30°E  | April/July/Oct,<br>2009;Jan, 2010 | SO <sub>4</sub> ,BC,OC | Zhao et al. [2013]  | urban              |
| Beijing2     | 39.99°N,<br>116.30°E  | April/July/Oct,<br>2009;Jan, 2010 | SO <sub>4</sub> ,BC,OC | Zhang et al. [2013] | urban              |
| Tianjin      | 39.08°N,<br>117.20°E  | April/July/Oct,<br>2009;Jan, 2010 | SO <sub>4</sub> ,BC,OC | Zhao et al. [2013]  | urban              |
| Shijiazhuang | 38.04°N,<br>114.51°E  | April/July/Oct,<br>2009;Jan, 2010 | SO <sub>4</sub> ,BC,OC | Zhao et al. [2013]  | urban              |
| Zhengzhou    | 34.80°N,<br>113.50°E  | April/July/Oct,<br>2009;Jan, 2010 | SO <sub>4</sub> ,BC,OC | Geng et al. [2013]  | urban              |
| Shanghai     | 31.18°N,<br>121.42 °E | Jan, 2009                         | SO <sub>4</sub> ,BC,OC | Feng et al. [2012]  | urban              |
|              | 31.25°N,<br>121.46 °E | Oct, 2005;<br>Jan/Apr/July,2006   | SOA                    | Feng et al. [2009]  | urban,<br>suburban |
| Wuhan        | 30.50°N,<br>114.3 °E  | Aug 2012- July<br>2013            | SOA                    | Zhang et al. [2015] | urban,<br>suburban |
| Chengdu*     | 30.65°N,<br>104.00°E  | Apr/May, 2009                     | SO <sub>4</sub> ,BC,OC | Tao et al., [2013]  | urban              |
| Xiamen       | 24.58°N,<br>118.09°E  | Jun,2009-<br>May,2010             | SO <sub>4</sub> ,BC,OC | Zhang et al. [2012] | urban              |
| Guangzhou    | 23.10°N,<br>113.3°E   | April/July/Oct,<br>2009;Jan, 2010 | SO <sub>4</sub> ,BC,OC | Tao et al. [2014]   | urban              |
|              | 23.70°N,<br>113.6°E   | Mar,2012-<br>Mar,2013             | SOA                    | Lai et al.[2015]    | rurual             |

\* *Tao et al.* [2013] highlights the importance of the dust and biomass burning episodes to the chemical composition of PM<sub>2.5</sub>. We use their data on non-episodic days.

25

### 3. Observed aerosol direct radiative effects in China

**Table S3. Aerosol direct radiative effects (ADREs) at TOA, surface (SFC), and within the atmosphere (ATM) in different regions and periods in China.**

| Region                             | References         | Period              | TOA<br>(W m <sup>-2</sup> ) | SFC<br>(W m <sup>-2</sup> ) | ATM<br>(W m <sup>-2</sup> ) |
|------------------------------------|--------------------|---------------------|-----------------------------|-----------------------------|-----------------------------|
| <i>CSHNET</i>                      | Li et al. (2010)   | Jan.-Dec. 2005      |                             |                             |                             |
| Ansai (36.85°N, 109.31°E)          | Xin et al. (2007)  |                     | -0.46                       | -12.08                      | 12.58                       |
| Beijing (39.97°N, 116.37°E)        |                    |                     | -3.30                       | -30.60                      | 27.30                       |
| Beijing Forest (39.96°N, 115.43°E) |                    |                     | -0.91                       | -7.59                       | 6.66                        |
| Changbai Mt. (42.40°N, 128.63°E)   |                    |                     |                             | -6.67                       | 6.82                        |
| Eerduosi (39.48°N, 110.18°E)       |                    |                     |                             | -6.02                       | 6.02                        |
| Fengqiu (35.00°N, 114.40°E)        |                    |                     | -0.12                       | -14.34                      | 14.22                       |
| Fukang (44.28°N, 87.92°E)          |                    |                     | 2.03                        | -5.80                       | 7.80                        |
| Haibei (37.45°N, 101.32°E)         |                    |                     |                             |                             | 3.57                        |
| Hailun (47.43°N, 126.63°E)         |                    |                     |                             | -6.78                       | 7.06                        |
| Jiaozhou Bay (35.90°N, 120.18°E)   |                    |                     | -2.81                       | -24.12                      | 21.31                       |
| Lanzhou (36.07°N, 103.82°E)        |                    |                     |                             | -22.29                      | 21.94                       |
| Lhasa (29.67°N, 91.33°E)           |                    |                     |                             | -4.28                       | 4.83                        |
| Sanjiang (47.58°N, 133.52°E)       |                    |                     | 0.93                        | -6.92                       | 7.85                        |
| Shanghai (31.12°N, 121.75°E)       |                    |                     |                             | -24.26                      | 25.09                       |
| Shapotou (37.45°N, 104.95°E)       |                    |                     |                             | -7.45                       | 7.42                        |
| Shenyang (41.52°N, 123.63°E)       |                    |                     |                             | -14.58                      | 16.15                       |
| Taihu (31.40°N, 120.22°E)          |                    |                     | -2.64                       | -15.79                      | 13.15                       |
| Taoyuan (28.92°N, 111.45°E)        |                    |                     | 0.35                        |                             | 19.95                       |
| Xianghe (39.75°N, 116.96°E)        |                    |                     | -1.28                       | -28.78                      | 27.50                       |
| Yanting (31.27°N, 105.45°E)        |                    |                     | 1.26                        | -29.61                      | 30.78                       |
| Xishuangbanna(21.9°N, 101.27°E)    |                    |                     | 2.40                        | -18.17                      | 20.55                       |
| <i>Others</i>                      |                    |                     |                             |                             |                             |
| Xianghe (39.75°N, 116.96°E)        | Li et al. (2007)   | Jan.-Dec. 2004-2005 |                             | -24                         |                             |
| Beijing (39.98°N, 116.38°E)        | Xia et al. (2007a) | Dec.-Feb.           | -8.0                        | -20.3                       |                             |

|                               |                      |                     |       |        |       |
|-------------------------------|----------------------|---------------------|-------|--------|-------|
|                               |                      | Mar.-May            | -13.9 | -46.1  |       |
|                               |                      | Jun.-Aug.           | -13.5 | -45.6  |       |
|                               |                      | Sep.-Nov.           | -10.7 | -30.0  |       |
|                               |                      | 2001-2005           |       |        |       |
| Liaozhong (41.50°N, 120.70°E) | Xia et al. (2007b)   | Mar.-May 2005       |       | -30    |       |
| Taihu (31.70°N, 120.36°E)     | Xia et al. (2007c)   | Jan.-Dec. 2005-2006 | 0     | -38.4  |       |
| Nanjing (32.05°N, 118.78°E)   | Zhuang et al. (2014) | Jan.-Dec. 2011-2012 | -6.9  | -21.3  |       |
| SACOL (35.95°N, 104.10°E)     | Liu et al. (2011)    | May 2009            | -7.78 | -38.45 | 30.68 |

### 30 References

- Feng, J., Sun, P., Hu, X., Zhao, W., Wu, M., and Fu, J.: The chemical composition and sources of PM<sub>2.5</sub> during the 2009 Chinese New Year's holiday in Shanghai, *Atmos. Res.*, 118, 435-444, 2012.
- Feng, Y., Chen, Y., Guo, H., Zhi, G., Xiong, S., Li, J., Sheng, G., and Fu, J.: Characteristics of organic and elemental carbon in PM<sub>2.5</sub> samples in Shanghai, China, *Atmos. Res.*, 92(4), 434-442, 2009.
- 35 Geng, N., Wang, J., Xu, Y., Zhang, W., Chen, C., and Zhang, R.: PM<sub>2.5</sub> in an industrial district of Zhengzhou, China: chemical composition and source apportionment, *Particuology*, 11(1), 99-109, 2013.
- Huang, L. and Wang, G.: Chemical characteristics and source apportionment of atmospheric particles during heating period in Harbin, China, *J. Environ. Sci.*, 26(12), 2475-2483, 2014,.
- Lai, S., Zhao, Y., Ding, A., Zhang, Y., Song, T., Zheng, J., Ho, K. F., Lee, S.-C., and Zhong, L.: Characterization of  
40 PM<sub>2.5</sub> and the major chemical components during a 1-year campaign in rural Guangzhou, Southern China, *Atmos. Res.*, 167, 208-215, 2016.
- Li, Z., Xia, X., Cribb, M., Mi, W., Holben, B., Wang, P., Chen, H., Tsay, S. C., Eck, T. F., Zhao, F., Dutton, E. G., and Dickerson, R. E.: Aerosol optical properties and their radiative effects in northern China, *J. Geophys. Res.*, 112, D22S01, doi:10.1029/2006JD007382, 2007.
- 45 Li, Z., Lee, K. H., Wang, Y., Xin, J., Hao, W.-M.: First observation based estimates of cloud free aerosol radiative forcing across China, *J. Geophys. Res.-Atmos.*, 115(D7), 2010.
- Liu, Y., Huang, J., Shi, G., Takamura, T., Khatri, P., Bi, J., Shi, J., Wang, T., Wang, X., and Zhang, B.: Aerosol optical properties and radiative effect determined from skyradiometer over Loess Plateau of Northwest China, *Atmos. Chem. Phys.*, 11, 11455-11463, 2011.
- 50 Tao, J., Zhang, L., Engling, G., Zhang, R., Yang, Y., Cao, J., Zhu, C., Wang, Y., and Luo, L.: Chemical composition of PM<sub>2.5</sub> in an urban environment in Chengdu, China: importance of springtime dust storms and biomass burning[, *Atmos. Res.*, 122, 270-283, 2013.

- Tao, J., Zhang, L., Ho, K., Zhang, R., Lin, Z., Zhang, Z., Lin, M., Cao, J., Liu, S., and Wang, G.: Impact of PM<sub>2.5</sub> chemical compositions on aerosol light scattering in Guangzhou-the largest megacity in South China, *Atmos. Res.*, 135, 48-58, 2014.
- 55
- Xia, X., Chen, H., Goloub, P., Zhang, W., Chatenet, B., and Wang, P.: A complicaition of aerosol optical properties and calculation of direct radiative forcing over an urban region in northern China, *J. Geophy. Res.*, 112, d12203, doi:10.1029/2006JD008119, 2007a.
- Xia, X., Chen, H., Li, Z., Wang, P., and Wang J.: Significant reduction of surface solar irradiance induced by aerosols in a suburban region in northeastern China, *J. Geophys. Res.*, 112, doi:10.1029/2006JD007562, 2007b.
- 60
- Xia, X., Li, Z., Holben, B., Wang, P., Eck, T., Chen, H., Cribb, M., and Zhao, Y.: Aerosol optical properties and radiative effects in the Yangtze Delta region of China, *J. Geophys. Res.*, 112, D22S12, 2007c.
- Zhang, F., Xu, L., Chen, J., Yu, Y., Niu, Z., and Yin, L.: Chemical compositions and extinction coefficients of PM<sub>2.5</sub> in peri-urban of Xiamen, China, during June 2009–May 2010, *Atmos. Res.*, 106, 150-158, 2012.
- 65
- Zhang, R., Jing, J., Tao, J., Hsu, S.-C., Wang, G., Cao, J., Lee, C. S. L., Zhu, L., Chen, Z., Zhao, Y., and Shen, Z.: Chemical characterization and source apportionment of PM<sub>2.5</sub> in Beijing: seasonal perspective, *Atmos. Chem. Phys.*, 13(14), 7053-7074, 2013.
- Zhao, P. S., Dong, F., He, D., Zhao, X. J., Zhang, X. L., Zhang, W. Z., Yao, Q., and Liu, H. Y.: Characteristics of concentrations and chemical compositions for PM<sub>2.5</sub> in the region of Beijing, Tianjin, and Hebei, China, *Atmos. Chem. Phys.*, 13, 4631-4644, 2013.
- 70
- Zhuang, B.L., Wang, T.J., Li, S., Liu, J., Talbot, R., Mao, H.T., Yang, X.Q., Fu, C.B., Yin, C.Q., Zhu, J. L., Che, H.Z., and Zhang, X.Y.: Optical properties and radiative forcing of urban aerosols in Nanjing, China, *Atmos. Environ.*, 83, 43-52, 2014.
